# Supplementary material for: Natural variation in temperature-modulated immunity uncovers transcription factor bHLH059 as a thermoresponsive regulator in Arabidopsis thaliana
Source: PLoS Genet. 2021 Jan 25;17(1):e1009290. doi: 10.1371/journal.pgen.1009290 (PMC7861541; doi:10.1371/journal.pgen.1009290)
Supplement: S2 Table — (XLSX) [file pgen.1009290.s002.xlsx]

## Sheet: Table S2
Table S2: Correlation between above ground fresh weight and dry weight in 5 week old A. thaliana accessions grown at 22°C under controlled conditions
	replicate a			replicate b			replicate c
accession	R	p-value		R	p-value		R	p-value
Bor-4	0.99	1e-07		0.99	6.2e-06		0.96	0.0001
C24	0.99	2.9e-07		0.99	9.3e-07		0.97	4.75e-05
Col-0	0.99	1e-09		0.99	2.7e-06		0.98	0.03089
Est-1	0.99	3.8e-06		0.98	1.9e-05		0.83	0.01
Sha	0.99	2.8e-05		0.99	4.9e-08		0.92	0.001
Ws-0	0.99	8.9e-08		0.99	4.9e-06		0.95	3.854e-08
Data collected from 6 A. thaliana accessions in 5 week-old plants (DF = 7). R= Pearson’s correlation index.
